# Supplementary material for: Rules for resolving Mendelian inconsistencies in nuclear pedigrees typed for two-allele markers
Source: PLoS One. 2017 Mar 2;12(3):e0172807. doi: 10.1371/journal.pone.0172807 (PMC5333839; doi:10.1371/journal.pone.0172807)
Supplement: S1 Table — The denominator is the number of actual errors present and the numerator is the number of errors detected by PedCheck. (DOCX) [file pone.0172807.s002.docx]

S1 Table: Percent of time genotype errors detected. The denominator is the number of actual errors present and the numerator is the number of errors detected by PedCheck.

| Sibship Size | Categories | SNP Allele Frequency | | | | |
| --- | --- | --- | --- | --- | --- | --- |
| 0.1 | 0.2 | 0.3 | 0.4 | 0.5 |
| 2 | Siblings |  |  |  |  |  |
| Parents |  |  |  |  |  |
| Either |  |  |  |  |  |
| 3 | Siblings |  |  |  |  |  |
| Parents |  |  |  |  |  |
| Either |  |  |  |  |  |
| 4 | Siblings |  |  |  |  |  |
| Parents |  |  |  |  |  |
| Either |  |  |  |  |  |
| 5 | Siblings |  |  |  |  |  |
| Parents |  |  |  |  |  |
| Either |  |  |  |  |  |
| 6 | Siblings |  |  |  |  |  |
| Parents |  |  |  |  |  |
| Either |  |  |  |  |  |
